# Supplementary material for: Disentangling the effects of sex, life history and genetic background in Atlantic salmon: growth, heart and liver under common garden conditions
Source: R Soc Open Sci. 2020 Oct 7;7(10):200811. doi: 10.1098/rsos.200811 (PMC7657880; doi:10.1098/rsos.200811)
Supplement: emmeans_lifestage_sex_AHH.csv [file rsos200811supp2.csv]

Measurement	Sex	Value	upper.CL	lower.CL
AHH	freshwater_male	-0.002783594	0.017331535	-0.022898723
AHH	freshwater_female	-0.01895587	0.004475651	-0.042387391
AHH	saltwater_male	-0.005741804	0.013824175	-0.025307784
AHH	saltwater_female	0.023634065	0.042429896	0.004838233
