# Supplementary material for: Disentangling the effects of sex, life history and genetic background in Atlantic salmon: growth, heart and liver under common garden conditions
Source: R Soc Open Sci. 2020 Oct 7;7(10):200811. doi: 10.1098/rsos.200811 (PMC7657880; doi:10.1098/rsos.200811)
Supplement: emmeans_lifestage_sex_WHR.csv [file rsos200811supp1.csv]

Measurement	Sex	Value	upper.CL	lower.CL
WHR	freshwater_male	-0.004718174	0.020825574	-0.030261921
WHR	freshwater_female	-0.02853259	-0.000897098	-0.056168083
WHR	saltwater_male	0.007476924	0.032442679	-0.017488831
WHR	saltwater_female	0.021314795	0.04557088	-0.002941291
