# Supplementary material for: Disentangling the effects of sex, life history and genetic background in Atlantic salmon: growth, heart and liver under common garden conditions
Source: R Soc Open Sci. 2020 Oct 7;7(10):200811. doi: 10.1098/rsos.200811 (PMC7657880; doi:10.1098/rsos.200811)
Supplement: emmeans_sex_AH_width.csv [file rsos200811supp3.csv]

Sex	Value	upper.CL	lower.CL
female	0.00507435	0.014544035	-0.004395335
male	-0.01114294	-0.001745514	-0.020540364
