# Supplementary material for: Disentangling the effects of sex, life history and genetic background in Atlantic salmon: growth, heart and liver under common garden conditions
Source: R Soc Open Sci. 2020 Oct 7;7(10):200811. doi: 10.1098/rsos.200811 (PMC7657880; doi:10.1098/rsos.200811)
Supplement: emmeans_sex_AHH.csv [file rsos200811supp4.csv]

Measurement	Sex	Value	upper.CL	lower.CL
AHH	female	0.002339097	0.02014539	-0.01546719
AHH	male	-0.004262699	0.01253627	-0.02106166
