# Supplementary material for: Disentangling the effects of sex, life history and genetic background in Atlantic salmon: growth, heart and liver under common garden conditions
Source: R Soc Open Sci. 2020 Oct 7;7(10):200811. doi: 10.1098/rsos.200811 (PMC7657880; doi:10.1098/rsos.200811)
Supplement: emmeans_sex_AHweight.csv [file rsos200811supp5.csv]

Measurement	Sex	Value	upper.CL	lower.CL
AH_weight	female	0.010578442	0.02511191	-0.003955024
AH_weight	male	-0.001889301	0.01255688	-0.016335479
